# Supplementary material for: Ocean Modeling with Adaptive REsolution (OMARE, version 1.0) – Refactoring NEMO model (version 4.0.1) with the parallel computing framework of JASMIN. Part 1: adaptive grid refinement in an idealized double-gyre case
Source: Copernicus journal article supplement (doi:10.5194/egusphere-2022-510), 2022-06-28
Supplement: Supplementary file [file egusphere-2022-510-AC1-supplement.pdf]

## Author reply to the CEC1 to ‘egusphere-2022-510’ (Zhang et al., 2022)

Dear Professor Juan Añel and Dr. Farneti,

Thank you very much for the comment. On behalf of all authors, I have the following reply and clarifications regarding the issues in your comment, mainly concerning the JASMIN software. The detailed reply is as follows, and in general we want to emphasize that, JASMIN is a third-party, infrastructural software of the model we presented (instead of the model itself), and we have updated the approaches of applying/using JASMIN, as follows.

### (1) About the role of JASMIN as an infrastructure to our modeling study:

In the manuscript we introduced the model of OMARE, including the detailed process of constructing it, as well as initial results of numerical experiments. JASMIN is the environment that we construct and run the model. The scenario here, in our opinion, is similar to the that for porting a model (e.g., NEMO) onto a specific computational platform (e.g., CUDA). This example, very similar to ours, also involves the refactorization of model code, and code compilation/linkage as well as execution on the platform. Similar to JASMIN, the CUDA toolkit (available from NVIDIA, but closed-source, commercial software) serves as the infrastructure to the model development. Also similar to CUDA-alike software platforms, JASMIN is general-purposed, not specifically made for geophysical fluid models.

Furthermore, similar works to the platform-specific model development are actually very common in the GMD journal, which are all based on closed-source software. Not to mention the compilers and MPI environment, many of which are closed source. For the clarification from our point of view, given that the software (here JASMIN) serves as the model’s infrastructure, its open-source status should not be a limiting factor, and it does NOT constitute compliance issues with GMD policy. Of course, the prerequisite is that the infrastructural software IS INDEED available for use/validation, which is addressed further below.

### (2) On the open-source status of our work:

Upon the reminder from the editor, we immediately open-sourced the code, together with some of the output for public access. The newly added code (based on NEMO codebase) consists of about 100’000 new lines, in either FORTRAN or C++, and the whole source is already provided. Besides, due to the sheer volume of the model output, we could only publish some results, and the full set is readily available upon request.

We would like to emphasize that: we totally agree with the spirit of open-source for both contribution to the community and reproducibility/validation by peer scientists. At the same time, we are also aware of the various practical limitations of many existing papers (including recent ones), such as the licensing of model software to a limited (type of) audience, which are not uncommon on GMD or journals with similar focus. As model developers, we benefit from this movement, and we are definitely willing to contribute our efforts at GMD to the community.

(3) On the status & availability of JASMIN:

JASMIN is developed by Institute of Applied Physics and Computational Mathematics (IAPCM) and IAPCM holds the full copyright to it. We, as external users of JASMIN, do not have access to the code, not to mention the right to disclose the code. Some of the authors of our paper are affiliated with IAPCM who helped with the software porting process, but this is an independent issue to the open-source status of JASMIN.

Currently JASMIN is distributed in the binary format. Third-party application, such as ours, are developed according to JASMIN's software API, and linked with the binary library of JASMIN. This is also common practice for using third-party software, and it is counterpart to the practice with open-source software which requires the end user to compile from scratch.

In order to overcome the availability issues of JASMIN as raised in CEC, we have provided the following two ways for applying JASMIN. First, one can apply for JASMIN by writing to: [yang\\_zhang@iapcm.qc.cn](mailto:yang_zhang@iapcm.qc.cn). The JASMIN software will be provided through replies. Any inquiries/questions about using JASMIN and OMARE are also handled through this contact.

Second, since the English version of the webpage for JASMIN application is under construction, we provide the step-by-step instruction in the following pages. This guide is based on the original JASMIN application page at: <http://www.caep-scns.ac.cn/JASMIN.php>. And it provided in case that anyone interested in selecting specific version/platform for JASMIN.

We would like to express our sincere thanks again to the editors for their help. And we hope that our reply has fully addressed the comments by the chief editor.

Shiming Xu, on behalf of all authors

# An instruction of the webpage for JASMIN application

## Step 0: Registration & Login

2022/8/15 02:06

JASMIN (并行自适应结构网格应用编程框架)

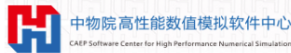

首页

中心概况

软件产品

人才招聘

品牌会议

登录 | 注册  
Log in | Register  
联系我们

| 软件产品              |   |
|-------------------|---|
| 高性能科学与工程计算中间件     | ▼ |
| JASMIN            |   |
| JAUMIN            |   |
| JCOGIN            |   |
| SuperMesh         |   |
| TeraVAP           |   |
| HiPro             |   |
| HiPESL            |   |
| 反应堆粒子输运软件系统       | > |
| 复杂电磁环境数值模拟软件系统    | > |
| 重大装备工程力学数值模拟软件系统  | > |
| 核相关/含能材料模拟与设计软件系统 | > |

产品介绍

成果展示

软件下载

升级更新

参考资料

### JASMIN

Click to log in or register

**简介：**

JASMIN是面向结构网格应用研制的编程框架。该框架面向现代高性能计算机体系结构，设计数据接口、发展和集成高效并行算法、采用先进软件技术，提供屏蔽并行实现的编程接口，支持领域专家在个人电脑上“并行思考、串行编程”，快速研制并行应用软件。

JASMIN框架已成功应用于武器物理、激光聚变、高新技术装备等领域，支撑了4个亿亿次和30多个千万亿次应用软件的快速研发和数值模拟。

物理模型

计算参数

计算方法

高级算法

专家经验

物理数学接口、  
实现JASMIN的  
物理接口函数

应用接口层

数值接口层

JASMIN  
框架

非并行应用工程层

支持JASMIN实际应用的抽象接口函数  
Interface Functions for User Applications

多物理时间和分算法  
MultiPhysics Integrator

面向应用的计算工具箱  
Application Utilities

求解器  
Solvers

时间积分算法  
Time Integrator

网格几何  
Grid Geometry

数学运算  
Math. Ops.

网格自适应  
Mesh Adaptivity

数据传输  
Communication

负载均衡  
Load Balancing

网格片层次结构  
Patch Hierarchy

数据片  
Patch Data

基本工具箱  
Toolbox

**功能特色：**

1. 支持多种网格类型：单块结构网格、多块结构网格（协调拼接、非协调拼接）、自适应加密结构网格；
2. 支持多种计算方法：h-自适应、r-自适应、接触碰撞、输运扫描、粒子模拟；
3. 集成多种求解器：线性、非线性、特殊求解器（FMM、FFT、Kohn-Sham、Poisson）及预条件库；
4. 支撑多物理场、多时空尺度耦合计算；
5. 支持异构协同计算；
6. 具备自动容错功能，支持“一次提交，完整模拟”；
7. 配备图形化集成开发环境，屏蔽并行编程和面向对象编程；

**应用实例：**

| 典型应用软件         | 应用领域 | 计算规模              | 处理器核数                           |
|----------------|------|-------------------|---------------------------------|
| 时域全波电磁模拟软件     | 电磁环境 | 4608 亿网格          | 93 万异构核（12 万 CPU 核 +81 万 MIC 核） |
| 激光等离子体相互作用粒子模拟 | 激光聚变 | 1555 亿粒子          | 93 万异构核（12 万 CPU 核 +81 万 MIC 核） |
| 激光等离子体相互作用流体力学 | 激光聚变 | 805 亿网格           | 93 万异构核（12 万 CPU 核 +81 万 MIC 核） |
| 三维辐射流体力学界面不稳定性 | 激光聚变 | 70 亿网格            | 80 万异构核（10 万 CPU 核 +70 万 MIC 核） |
| 二维辐射流体耦合中子输运程序 | 武器物理 | 上亿自由度             | 1.2 万 CPU 核                     |
| 关联电子体系模拟软件     | 材料科学 | 60 个K点 × 400 个特征态 | 1.2 万 CPU 核                     |
| 三维冲击动力学粒子模拟    | 材料科学 | 2.56 亿粒子          | 3.2 万 CPU 核                     |

**更新说明：**

JASMIN\_LITE 4.0.0版更新内容：

1. 并行扩展性的提升，可有效实现20万核CPU上的大规模计算；
2. 将求解器分离出来，独立发布。

JASMIN 4.0.0版更新内容：

1. 功能性能：新增了多层自适应和多块网格支持，并支持了FFT特殊求解器。除了一般求解器被移到IPSOL和不支持6MR之外，支持了JASMIN 3.2 版本的全部功能。
2. 使用方式：匹配软件产品使用方式的标准化，对通过CMake使用JASMIN的接口进行了调整，不再兼容此前的CMake使用方式；通过Makefile.config使用JASMIN的接口保持向后兼容。
3. 内部结构：JASMIN 4.0正式版改变了库的打包方式，不再将各个组件作为单独的库文件，而是打包在一起成为一个库文件。文件布局也参照LSB的FHS规范进行了更新。

地址：北京市海淀区花园路6号 邮编：100088 传真：010-61935702  
Copyright © 2014-2022 中物院高性能数值模拟软件中心 京ICP备12047833号-3

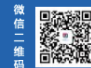

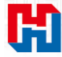

Click to log in  
if have an account

加入我们

产品试用

Username: 用户名   
Password: 密码

Click to log in →

登 陆

取 消

Log in

Cancel

应聘人员注册

加入我们

( 应聘人员投递简历前请先注册 )

Register an account to  
apply for JASMIN

软件试用人员注册

软件试用

( 用户可申请下载试用型软件产品 )

Click to register

地址：北京市海淀区花园路6号 邮编：100088 传真：010-61935702

Copyright © 2014-2022 中物院高性能数值模拟软件中心 京ICP备12047833号-3

微信  
二维码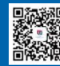

个人用户信息 (\* 为必填项) User information of registration

|                   |         |                                        |             |
|-------------------|---------|----------------------------------------|-------------|
| Username:         | 用户名 *   | YanZhangTest                           | ( 字母和数字 )   |
| Password:         | 登录密码 *  | *****                                  |             |
| Email:            | 电子邮箱 *  | test@mails.tsinghua.edu.cn             | ( 找回密码时使用 ) |
| Actual name:      | 用户姓名 *  | YanZhang                               |             |
| ID:               | 身份证号 *  | 321322000000000000                     |             |
| Contact Tel.:     | 联系电话 *  | +86 188-0000-0000                      |             |
| Institute:        | 所在单位 *  | Tsinghua University                    |             |
| Address:          | 单位地址 *  | Tsinghua University, Beijing, China    |             |
| Department:       | 所在部门 *  | Department of the Earth System Science |             |
| Position / Title: | 职务/职称 * | Ph.d                                   |             |
| Field of study:   | 研究领域 *  | Ocean Modeling                         |             |

Click to register →

提 交 返 回  
Submit Return

2022/8/13 18:45

JASMIN（并行自适应结构网格应用编程框架）

Login Status | Exit

您好RockyZY | 退出

中物院高性能数值模拟软件中心

CAEP Software Center for High Performance Numerical Simulation

首页

中心概况

软件产品

人才招聘

品牌会议

联系我们

Software Products

软件产品

高性能科学与工程计算中间件

JASMIN

JAUMIN

JCOGIN

SuperMesh

TeraVAP

HiPro

HIPESL

反应堆粒子输运软件系统

复杂电磁场数值模拟软件系统

重大装备工程力学数值模拟软件系统

核相关/含能材料模拟与设计软件系统

首页

中心概况

软件产品

人才招聘

品牌会议

联系我们

Click

软件下载

Software application

产品介绍

成果展示

升级更新

参考资料

请选择您要下载的软件

1 请选择 版本

JASMIN(V3.2)

JASMIN\_LITE (V4.0.0)

JASMIN (V4.0.0)

1. Select a JASMIN version

(JASMIN v4.0.0)

2 请选择 类型

试用型

2. Select a type

(trial type)

3 请选择 类别

单机版 64核

3. Select a category

(stand-alone 64 cores)

4 请选择 操作系统

Linux-x86\_64

4. Select a operating system

(Linux-x86\_64)

5 请选择 申请

JASMIN (V4.0.0)

试用型 单机版 64核

Linux-x86\_64

更新日期: 2018-03-30

确认申请

重新选择

JASASMIN (V4.0.0)  
Trial Stand-alone  
64-core  
Linux-x86\_64  
Update Date:  
2018-03-30

Confirm  
Reselect

软件试用型:

|          | 试用型  |      |      |
|----------|------|------|------|
|          | 单机版  | 标准版  | 专业版  |
| 最大并行进程数  | 64   | 512  | 4096 |
| 使用期限     | 180天 | 180天 | 180天 |
| 计算效率优化模块 |      |      |      |
| 获取方式     | 免费申请 |      |      |

注：用户可免费申请试用型单机版。

地址：北京市海淀区花园路6号 邮编：100088 传真：010-61935702

Copyright © 2014-2022 中物院高性能数值模拟软件中心 京ICP备12047833号-3

微信二维码

## Step 2: Fill the application form

2022/8/13 18:40JASMIN（并行自适应结构网格应用编程框架）

中物院高性能数值模拟软件中心

CAEP Software Center for High Performance Numerical Simulation

首页

中心概况

软件产品

人才招聘

品牌会议

联系我们

软件产品

高性能科学与工程计算中间件

JASMIN

JAUMIN

JCOGIN

SuperMesh

TeraVAP

HiPro

HIPESL

反应堆粒子输运软件系统

复杂电磁环境数值模拟软件系统

重大装备工程力学数值模拟软件系统

核相关/含能材料模拟与设计软件系统

产品试用申请表

Trial Application Form of JASMIN

用户信息

User Information

单位名称清华大学Applicant Agency: (e.g. Tsinghua University)

联系人张岩Contact Name: (e.g. Yan Zhang)

联系电话18801087568Contact Tel: (e.g +86 188-0000-0000)

单位地址北京市海淀区清华大学蒙民伟科技大厦Address: (e.g. Tsinghua Univ., Beijing, China)

申请试用的软件产品信息JASMIN Information

软件版本JASMIN ( V4.0.0 )Version: JASMIN (v4.0.0)

软件类型试用型Type: Trial type

软件类别单机版 64核Category: Stand-alone 64-core

操作系统Linux-x86\_64Operating System: Linux-x86\_64

Trial period: No more than 180 days from the date of installation

申请试用期限自软件安装之日起不超过180天

Environment of high performance computing cluster

高性能计算环境

(supply information: CPU, operating system, MPI version, compiler, etc.)

应用目标Refactor NEMO with a parallel computing framework of JASMIN to develop the Ocean Modeling with Adaptive Resolution (OMARE)

应用目标 (500字以内)

软件维护需求远程维护与技术支持 (免费) 现场维护与技术支持 (付费)

远程维护与技术支持: 成功申请试用型软件产品的用户可免费享有远程维护与技术支持服务, 包括通过电话或互联网向用户解答问题和提供技术指导、澄清产品的功能和特点、分析和修订错误。

授权内容二进制版软件安装包

特别提示

· 请留下真实完整的信息, 以便我们的专业人员快速准确的提供给您相应的软件产品试用。

· 申请表中所提供的资料我们将予以保密。

· 申请表填写部分后可保存。填写完整并确认无误后成功提交将不能再做修改, 如需修改请联系中心。

· 提交成功后, 请在线阅读并接受《软件产品试用协议书》。我们将以电话和邮件形式通知您申请结果。

如有疑问请联系电话: 010-61935800

邮箱: scns-support@iapcm.ac.cn

提交

返回

Submit

Return

地址: 北京市海淀区花园路6号 邮编: 100088 传真: 010-61935702

Copyright © 2014-2022 中物院高性能数值模拟软件中心 京ICP备12047833号-3

微信二维码

## Step 3: Follow the agreement

2022/8/13 18:27

JASMIN (并行自适应结构网格应用编程框架)

您好RockyZY | 退出

CAEP Software Center for High Performance Numerical Simulation

首页中心概况软件产品人才招聘品牌会议联系我们

软件产品

高性能科学与工程计算中间件

JASMIN

JAUMIN

JCOGIN

SuperMesh

TeraVAP

HiPro

HIPESL

反应堆粒子输运软件系统

复杂电磁环境数值模拟软件系统

重大装备工程力学数值模拟软件系统

核相关/含能材料模拟与设计软件系统

首页 > 软件产品 > 高性能科学与工程计算中间件 > 软件产品试用协议书

软件产品试用协议书

Agreement of Trial Software Product

甲方: 中物院高性能数值模拟软件中心 Party A: Institute of Applied Physics and Computational Mathematics (IAPCM)

乙方: 张岩 Party B: (e.g. Yan Zhang)

甲方许可乙方试用甲方的 JASMIN (V4.0.0) 软件产品 (版本号: ), 试用型 (单机版 64核Linux-x86\_64) 的二进制版本 (以下简称“许可软件”)。使用期为自软件安装之日起不超过180天。双方本着平等自愿的原则, 签订本协议, 并由双方共同恪守。

一、甲方义务

1. 免费提供许可软件的二进制安装包和使用说明。

2. 试用期内可免费下载许可软件的升级包和最新版本。

3. 经乙方申请, 在试用期内可免费向乙方提供远程维护与技术支持服务, 包括通过电话或互联网解答问题和提供技术指导、澄清产品的功能和特点、分析和修订错误。

4. 经乙方申请, 可有信向乙方提供现场维护与技术支持服务, 包括派遣技术人员到安装现场解决维护和技术支持问题。相关费用请与甲方协商确定。

服务资源:

· 中心网址: http://www.caep-scns.ac.cn 技术支持栏目

· E-mail服务支持: scns-support@iapcm.ac.cn

· 服务电话: 010-61935800 (服务时间为工作时间, 每天8:30至17:00)

二、乙方义务

1. 使用许可软件前需向甲方提供真实的用途等具体信息。

2. 在使用许可软件过程中, 有义务定期将发现的许可软件的问题反馈给甲方, 配合甲方做出诊断。

3. 在使用许可软件过程中, 有义务为甲方提供许可软件的应用证明或使用报告。

三、许可限制

1. 未经甲方事先书面许可, 乙方不得实施以下行为:

(1) 将许可软件向第三方提供、销售、出租、出借、转让或提供分许可、转许可、通过信息网络传播或以其他形式供他人利用。

(2) 对许可软件进行全部或部分地翻译、分解、反向编译、反汇编、反向工程或其它试图从许可软件导出程序源代码的行为, 或在许可软件的

Click to follow the agreement → ☒ 我已认真阅读并将遵守以上条款。

Click

接受 返回

Accept Return

地址: 北京市海淀区花园路6号 邮编: 100088 传真: 010-61935702

Copyright @ 2014-2022 中物院高性能数值模拟软件中心 京ICP备12047833号-3

微信二维码

## Step 4: Wait for approval (1~3 working days)

2022/8/13 18:41

中物院高性能数值模拟软件中心\_会员中心

您好RockyZY | 退出

CAEP Software Center for High Performance Numerical Simulation

首页中心概况软件产品人才招聘品牌会议联系我们

会员中心

修改信息

消息

软件试用申请记录

首页 > 会员中心 > 软件试用申请记录

软件试用申请记录 Record of applications

| 试用申请编号                        | 申请时间                     | 产品名称                                 | 审核情况   | 下载 |
|-------------------------------|--------------------------|--------------------------------------|--------|----|
| JASMIN (V4.0.0) -2022-A0004   | 2022-08-13               | JASMIN (V4.0.0) 单机版 64核 Linux-x86_64 | 未审核    | —  |
| Serial number of applications | [1] 第 1 页, 共 1 页 共 1 条信息 | JASMIN information                   | Status |    |

地址: 北京市海淀区花园路6号 邮编: 100088 传真: 010-61935702

Copyright @ 2014-2022 中物院高性能数值模拟软件中心 京ICP备12047833号-3

微信二维码

Step 5: Download after approval (jasmin\_JASMIN4-4.0.0-Linux-x86\_64.sh)

中物院高性能数值模拟软件中心  
CAEP Software Center for High Performance Numerical Simulation

首页

中心概况

软件产品

人才招聘

品牌会议

联系我们

您好RockyZY | 退出

会员中心

修改信息

消息

软件试用申请记录

首页 > 会员中心 > 软件试用申请记录

软件试用申请记录 Records of applications

Click to download JASMIN binary installation package

| 试用申请编号                        | 申请时间                           | 产品名称                                   | 审核情况          | 下载       |
|-------------------------------|--------------------------------|----------------------------------------|---------------|----------|
| JASMIN ( V4.0.0 ) -2022-A0004 | 2022-08-13                     | JASMIN ( V4.0.0 ) 单机版 64核 Linux-x86_64 | 已通过<br>Status | 软件下载     |
| Serial number of applications | [1] 第 1 页, 共 1 页 共1条信息<br>Date | JASMIN information                     | Passed        | Download |

地址 : 北京市海淀区花园路6号 邮编 : 100088 传真 : 010-61935702

Copyright © 2014-2022 中物院高性能数值模拟软件中心 京ICP备12047833号-3

微信二维码
